# Supplementary material for: The histone acetyltransferase HBO1 functions as a novel oncogenic gene in osteosarcoma
Source: PubMed Central journal article supplement (PMC7978299; doi:10.7150/thno.55655), 2021-03-04
Supplement: thnov11p4599s1.pdf [file thnov11p4599s1.pdf]

**Table S1: sequences utilized in this study.**

| <b>qPCR primers</b> | <b>Forward 5'-3'</b>                                        | <b>Reverse 5'-3'</b>   |
|---------------------|-------------------------------------------------------------|------------------------|
| <i>Hoxa9</i>        | AGAATGAGAGCGGCGGAGACAA                                      | CTCTTTCTCCAGTTCCAGGGTC |
| <i>HBO1</i>         | TTTGGCCGCTATGAACTG                                          | GGAGGATTGTCTGGCTCTTC   |
| <i>GAPDH</i>        | GTCTCCTCTGACTTCAACAGCG                                      | ACCACCCTGTTGCTGTAGCCAA |
| <i>MYLK</i>         | GAGGTGCTTCAGAATGAGGACG                                      | GCATCAGTGACACCTGGCAACT |
| <b>shRNA</b>        |                                                             |                        |
| shHBO1-a            | CCGGGCCTTCTTCTGAGTCTGACATCTCGAGATGTCAGACTCAGAAGAAGGCTTTTT   |                        |
| shHBO1-b            | CCGGCTCGTTCATCTGGTTCAGAAACTCGAGTTTCTGAACCAGATGAACGAGTTTTT   |                        |
| shZNF384-s1         | CCGGGCCTTCACACAACCTCCAATCTCGAGATTGGAGAGTTGTGTGAAGGCTTTTTG   |                        |
| shZNF384-s2         | CCGGGATCGAGAACACAATGTTTTCATCTCGAGATGAACATTGTGTTCTCGATCTTTTT |                        |
| shZNF384-s3         | CCGGCGGCAACACAACAAGATAAACTCGAGTTTATCTTTGTTGTGTTGCCGTTTTTG   |                        |
| <b>siRNA</b>        |                                                             |                        |
| SOX10               | CCGUAUGCAGCACAAGAAA                                         |                        |
| SP2                 | UGCAGACCAUCAACAUCAA                                         |                        |
| ZNF 384             | AAUUACUUUAUAACAACUGGU                                       |                        |
| PITX3               | UUUAUUUCAUUUAUCUUUGAA                                       |                        |

## **HBO1 promoter region**

GCAGGAGAATCGCCTGAACCCGGGAGGCGGAGGCTGCGGTGAGCCGAGCTCGTGCCATTGC  
CCTCCAGCCTGGCAACAAGAGCAAAACCCTGTCTCAGAAAAAAAAAAAAAAAAAAGAAAGGC  
TGGTATGGCTGGGAGTGGTGGCTCACACCTTAATCCCAGCACTCTGGAAGGCCGAGACAGTA  
GTTTCAGCTCAGTAGGTCGAGACCAGCCTGGGCAGCATGGTGAAACTCTGTCTCTACAAAAAAT  
ACAAAAATTAGCCAGGTGTGGTGGCACACGCCTGCAGTCCCAGCTACTCGGGAGGCTGAGGC  
AAGAGAATCCCTTGAGCCCACGAGGTGGAGCTTGCAGTGAAGTACATCCAGCCATTGCACT  
CCAGCCTGGGCAACACAGCAAGACTCTGTCTTGAAAGAAAAAAAAAAGAAGAGAGAGAAAA  
AAGTAGGATGGTATGAAATAACTGAGATATGCTCTTAATGTAAGAGATCCTTACCACCAGTTGG  
GGAGCCAGAACATTCAAATGTAACCTCAGGAACATATCCGTGAGTGCAAATAACAGAGTAAT  
GTATGAAATTAATGCTTAAGTGGTGGGGCTACATGAAATTAATGCTTAAGTGGTGAGAA  
GTAATGTGAACCATTTTCAAATAAGTTCTTACGTGCAGTTCAACCTAAGTAGGTTATCAAAGGT  
ATTTATACTAAGCACTAAAAGCTAAGTATTAATACTAAAAGCTGCCTGTGTCAACACTGGCCC  
AGGACATCCCCAAGGAGAGTGCTGGCTAAAGGTCTGGAACCTTTAAATCTTTAGAGTTCTTTAC  
TTAGCACATCAATCAGATATTTACCTTCTGCTTCTTTGTTCTTTAGCCCTGCTCCTGGGGGAAAT  
CTCCATCTTAACGGGGCCTCAGTTTGAAATTGGGGTTCGGGATCCTAACTTAATGACTGAGCG  
TGCTGGGTTCCACCCAGTCGCAATTGGTCAAGACTTGGTCTCTCAAGGCCTTTCCTCCGGA  
GAGGTTAAATCCTCAACGCCTGCTCTCCACTTTCAGCCTTTTCTTAAGGCTCTTCTTTCAGCCT  
AGTATCTGTGACCAACTTCTCCTTCCCTAGGCCCTCTCATTATTATTTAAATGTCCATTCTTTTGGG  
GGCTTCAACTTCACTAAAAACATTCCTTCCTCTTCCTCCGCCTCGTAACTCTCTGCTCAAGCATC  
TGATGCCAGAGGTCATTTGAGCTAAATGGGGTTCAAAGCTTTTCTGACTCTGGTACTGCATTC  
CCACTTTCAAATCACATTTTTCACCCAGGGCCCCCAGTGGTCTCAAACCCAAACACAGTGC  
GGTTAGGAAGTGGGCACTCGCCACAGAGCTAAATTGGGAATTATTTGACCTGCAGCTTCTGGA  
GAATGGTTTTGCCTCCTCCCCGCGACATCAACTAACTCACTTGCTGTTAGCTAAGGGCAAGGA  
CAATGTCTCCTCTACCAGACAGGAACTTGATGGCGGACGCTATCCGTTAGTTCCTTTTTCAAT  
TCCCCATTCCCACCCCTTCGAGACCACGATGTTTCTTAAAATACAAAGTTTCTTTTACAAAACAT  
CCCTCCGCAACTTTGAGTTTATATAATAAACGGAAACGTCCTTTAAACAATCAGGCTACGAAG  
GGGTAAATCTAATCTCAGCAACCTGATGGATTCTGGGGGGTTTCTTCCTCGACTCTAGAAAT  
TAAAACGAAATTTTGCCCAAGGTAAAGATGAGAACCGTTTACATCAACTGTCAGGCTTCTGCC  
CCAAACAAGAATGGCTACCCACGCCACAAACAGAGCCACTCACGTAACCTAAAAATGGTTGG  
CTCCGGGTTCACCACTGGAGTCACTTTCTGCCAACTTCAAATGGCGCCACTAGCTTCACC  
AAAAGGATCGAACTTCCCAGCACCCCTCTCTGGCCCGTAACGTCAGGTGACGCGAGACCCAGC  
CGGAAGTGAAGGAAAAAGCGCTTACGCCCGCGGCCTGCGCAGAACGCTCCAGACGCTGA  
GAGGCAGGAGGCACTAGGGATCGTCCGCAGGATTGGGACTGATACAGAGGCCGCCACGGAG  
CCCGCCGGAGCCACCGTT

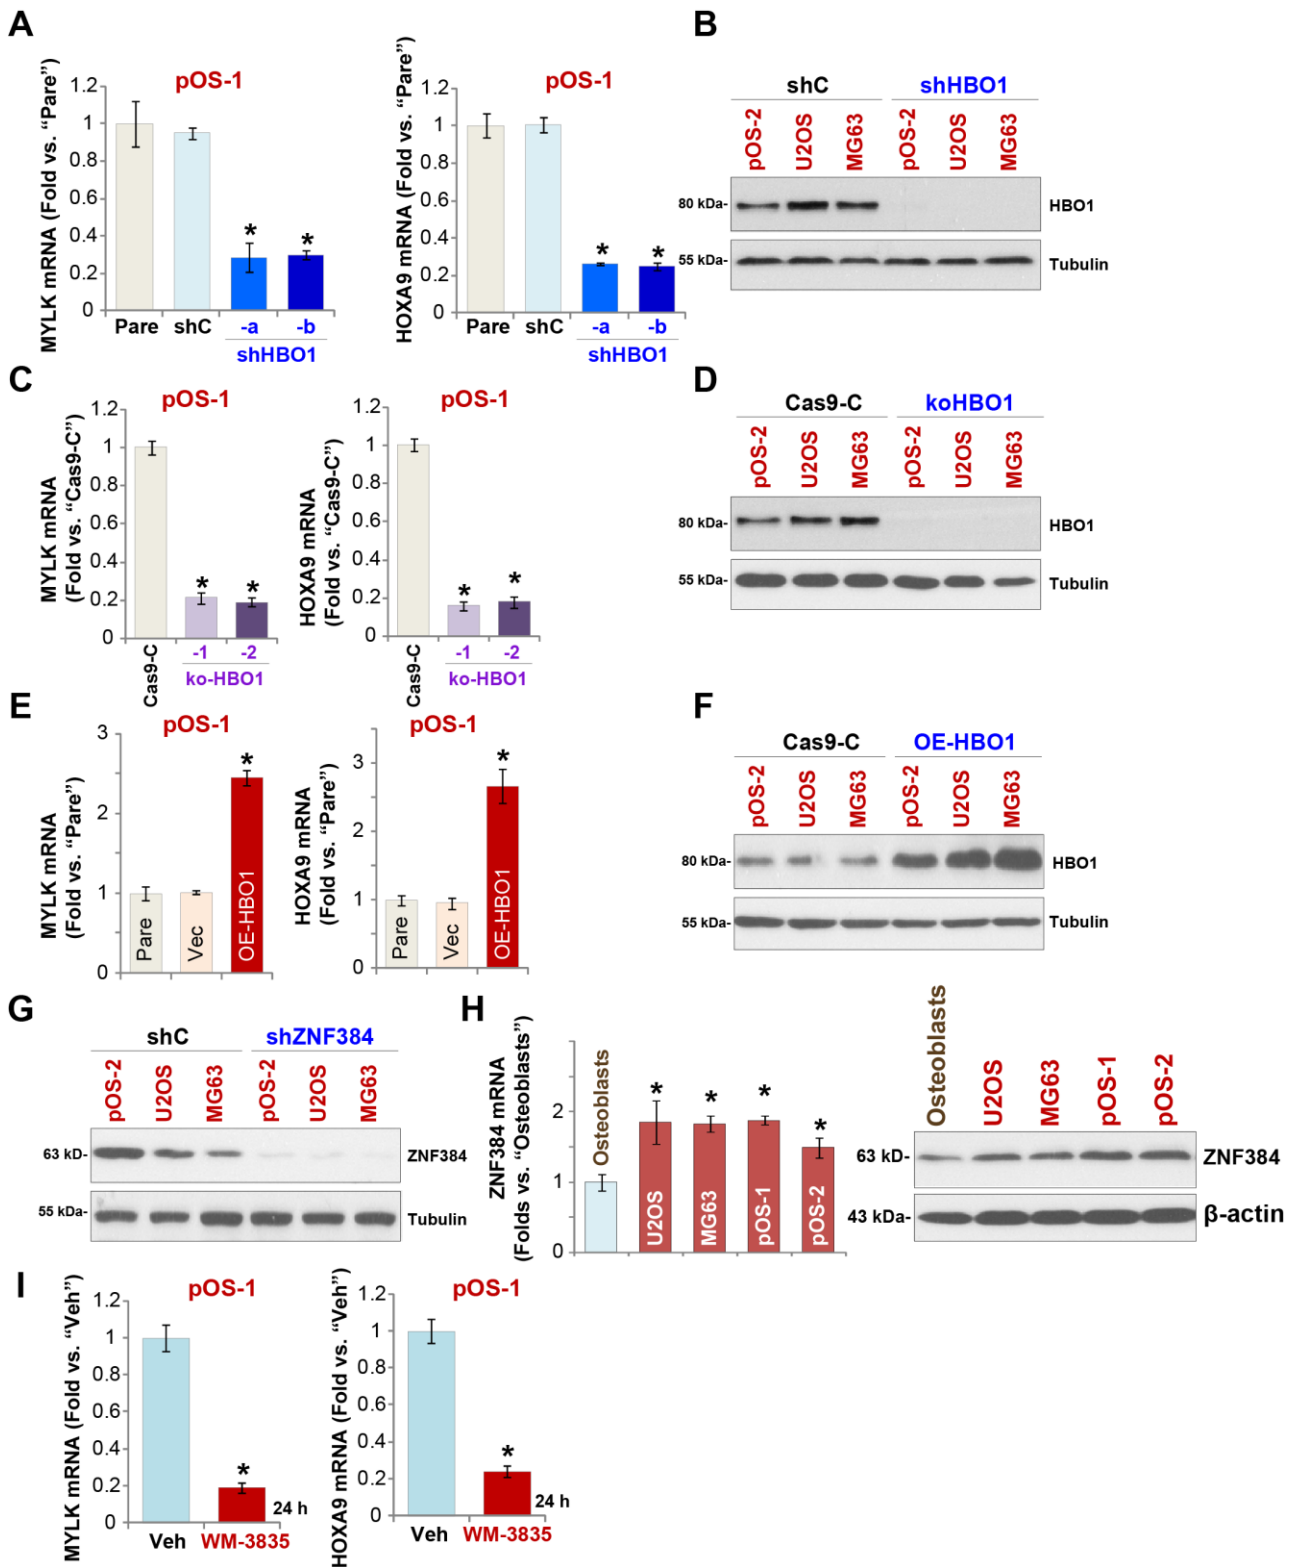

**Figure S1.** Expressions of *MYLK-HOXA9* mRNA and listed proteins in primary OS cells (pOS-1 and pOS-2) and established OS cell lines (U2OS and MG63), with described genetic modifications, were tested by qPCR and Western blotting analyses (A-G). *ZNF384* mRNA and protein expressions in established OS cell lines (U2OS and MG63), primary human OS cells

(pOS-1 and pOS-2), as well as in primary human osteoblasts (“Osteoblasts”) were shown (**H**). The pOS-1 cells were treated with WM-3835 (5  $\mu$ M) or vehicle control for 24h, *MYLK-HOXA9* mRNA expression was tested (**I**). The data were presented as mean  $\pm$  standard deviation (SD, n=5). \* *P* < 0.05 vs. “Pare”/“Cas9-C” cells, “Osteoblasts”, or “Veh” treatment. The experiments were repeated five times with similar results obtained.

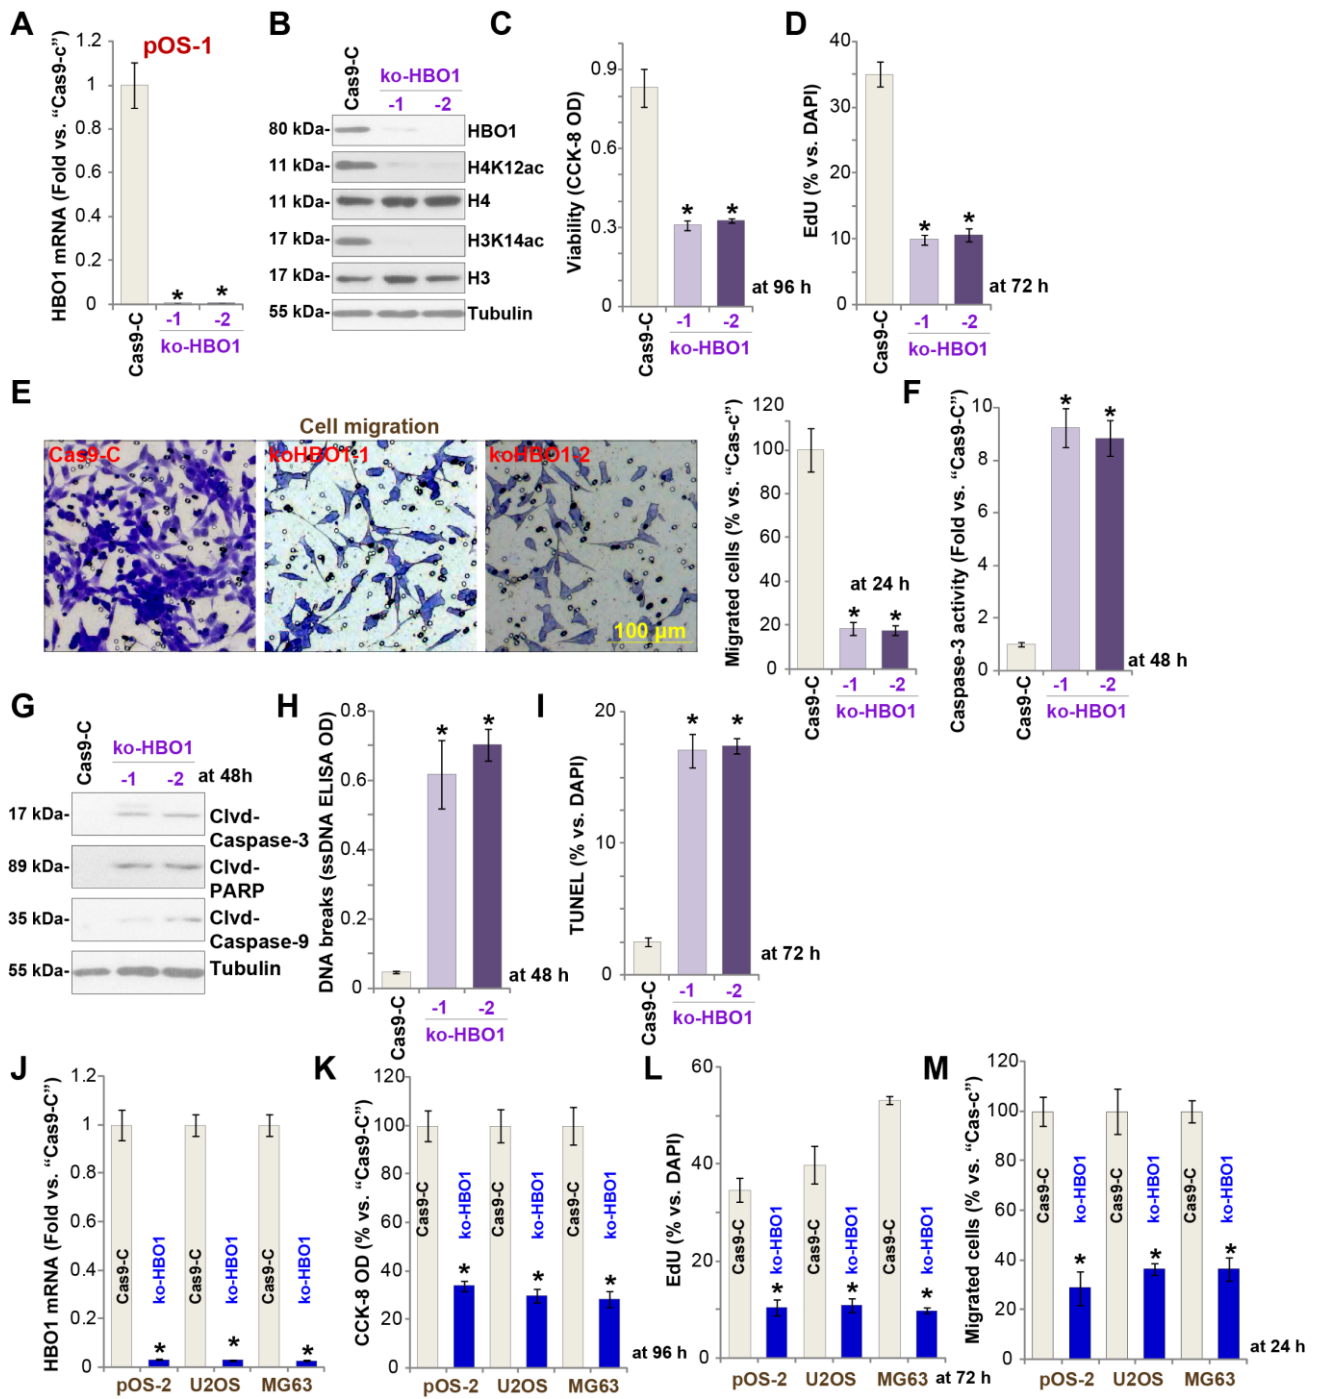

**Figure S2.** Stable primary OS cells (pOS-1 and pOS-2) and established OS cell lines (U2OS and MG63) with the lentiviral CRISPR/Cas9-HBO1-KO construct "koHBO1", or the CRISPR/Cas9 control construct "Cas9-C", were established. Expression of *HBO1* mRNA and listed proteins was shown (A, B and J); Cells were cultured for applied time periods; cell viability (C and K), proliferation (by recording EdU-positive nuclei ratio, D and L), and migration (E and M) were tested by the assays mentioned, with data quantified. The caspase-PARP activation (F and G), single strand DNA (ssDNA) contents (H), and cell

apoptosis (by recording nuclear TUNEL ratio, **I**) were tested as well. The data were presented as mean  $\pm$  standard deviation (SD, n=5). \*  $P < 0.05$  vs. “Cas9-C” cells. The experiments were repeated five times with similar results obtained. Scale bar= 100  $\mu$ m (**E**).

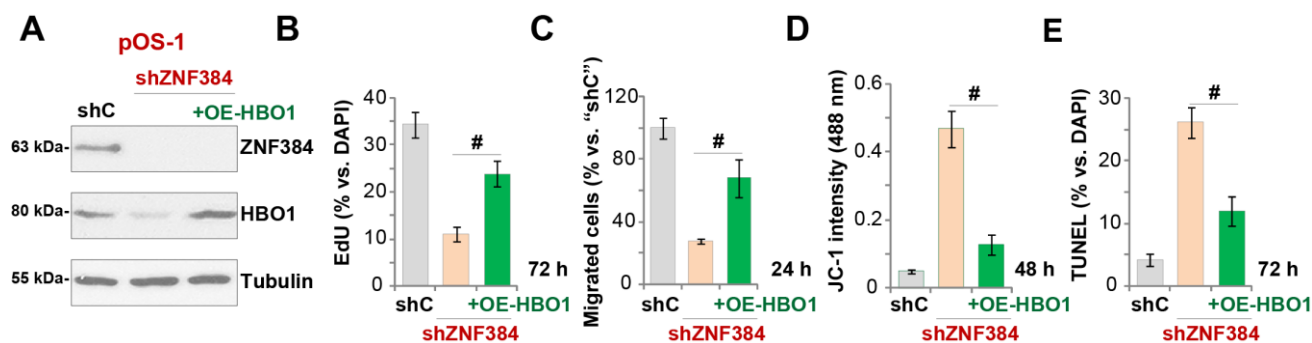

**Figure S3.** Stable pOS-1 cells expressing ZNF384 shRNA (“shZNF384”) were further transduced with or without the lentiviral construct encoding full-length *HBO1 cDNA* (“OE-HBO1”), and control cells were with the scramble control shRNA (“shC”). Expressions of listed proteins were shown (A); Cells were cultured for applied time periods; cell proliferation (EdU staining assay, B), migration (C), mitochondrial depolarization (by recording JC-1 green monomers intensity, D), and apoptosis (nuclear TUNEL staining assay, E) were tested. <sup>#</sup>*P* < 0.05. The experiments were repeated five times with similar results obtained.
